# Supplementary material for: Identification of activated enhancers and linked transcription factors in breast, prostate, and kidney tumors by tracing enhancer networks using epigenetic traits
Source: PubMed Central journal article supplement (PMC5103450; doi:10.1186/s13072-016-0102-4), 2016-11-09
Supplement: 13072_2016_102_MOESM9_ESM.pdf [file 13072_2016_102_MOESM9_ESM.pdf]

**Table S8.** List of de novo motifs enriched in TFs found from TENET E<sup>T</sup>:G<sup>+</sup> links for KIRC

| Motif ID                      | Motif profile                                                                       | Linked TF | E-value  | No. of loci with motif | Total no. of loci | Fraction of loci with motif |
|-------------------------------|-------------------------------------------------------------------------------------|-----------|----------|------------------------|-------------------|-----------------------------|
| K1                            |    | GLIS1     | 3.40E-07 | 134                    | 222               | 0.60                        |
| K2                            |    | GLIS1     | 6.10E-10 | 138                    | 222               | 0.62                        |
| K3                            |    | MAF       | 2.20E-18 | 190                    | 196               | 0.97                        |
| K4                            |   | TRIM15    | 4.10E-10 | 185                    | 185               | 1.00                        |
| K5<br>(Motif 1 from Figure 8) |  | ZNF395    | 2.30E-17 | 182                    | 183               | 0.99                        |
| K6                            |  | TFEC      | 1.90E-10 | 137                    | 137               | 1.00                        |
| K7                            |  | CREB3L3   | 3.50E-10 | 125                    | 125               | 1.00                        |
